# Supplementary material for: Inhibition of p38 Mitogen-Activated Protein Kinase Impairs Mayaro Virus Replication in Human Dermal Fibroblasts and HeLa Cells
Source: MDPI journal article supplement (doi:10.3390/v13061156), 2021-06-17
Supplement: s1 [file s1]

## Supplementary material

# Inhibition of p38 Mitogen-Activated Protein Kinase Impairs Mayaro Virus Replication in Primary Human Dermal Fibroblasts and HeLa Cells

Madelaine Sugasti <sup>1,2</sup>, Yessica Y. Llamas-González <sup>1,3</sup>, Dalkiria Campos <sup>1</sup> and José González-Santamaría <sup>1,\*</sup>

<sup>1</sup> Grupo de Biología Celular y Molecular de Arbovirus, Instituto Conmemorativo Gorgas de Estudios de la Salud, Panamá 0816-02593, Panamá; msugasti@gorgas.gob.pa (M.S.); qfb.y.llamas@gmail.com (Y.Y.L.G.); dcampos@gorgas.gob.pa (D.C.)

<sup>2</sup> Programa de Maestría en Microbiología Ambiental, Universidad de Panamá, Panamá, 3366, Panamá;

<sup>3</sup> Programa de Doctorado en Ciencias Biológicas, Universidad de la República, Montevideo 11200, Uruguay

\* Correspondence: jgonzalezsantamaria@gorgas.gob.pa; Tel.: +507-527-4814

**Table S1. List of primers used in this study.**

| Gene                           | Primer sequences (5'-3')                                              | References |
|--------------------------------|-----------------------------------------------------------------------|------------|
| <i>MDA5</i>                    | Forward: GCCATTGCAGATGCAACCAG<br>Reverse: TTGCGATTTCTTCTTTTGCAG       | [1]        |
| <i>ISG15</i>                   | Forward: GAGAGGCAGCGAACTCATCT<br>Reverse: CTCAGCTCTGACACCGACA         | [2]        |
| <i>MxA</i>                     | Forward: GGTGGTGGTCCCCAGTAATG<br>Reverse: ACCACGTCCACAACCTTGTCT       | [3]        |
| <i>RIG-I</i>                   | Forward: TGTTCTCAGATCCCTTGGATG<br>Reverse: CACTGCTCACCAGATTGCAT       | [4]        |
| <i>OAS2</i>                    | Forward: AAACCAGGCCTGTGATCTTG<br>Reverse: GGGCTATTTCCAGACAACGC        | [1]        |
| <i>AIM2</i>                    | Forward: ATCAGGAGGCTGATCCCAAAG<br>Reverse: TCTTCATCACTGCAGACACCG      | [1]        |
| <i>IL1-<math>\beta</math></i>  | Forward: AACCTCTTCGAGGCACAAGG<br>Reverse: GTCCTGGAAGGAGCACTTCAT       | [1]        |
| <i>TNF-<math>\alpha</math></i> | Forward: CAGAGGGAAGAGTTCCCCAGGGACC<br>Reverse: CCTTGGTCTGGTAGGAGACGG  | [5]        |
| <i>IL-6</i>                    | Forward: TGTGAAAGCAGCAAAGAGGCACTG<br>Reverse: ACAGCTCTGGCTTGTTCTCACTA | [4]        |
| <i>RANTES</i>                  | Forward: GAGGCTTCCCCTCACTATCC<br>Reverse: CTCAAGTGATCCACCCACCT        | [4]        |
| <i>IL-8</i>                    | Forward: CAGCCAAAACCTCCACAGTCA<br>Reverse: TTGGAGAGCACATAAAAAACATCT   | [4]        |
| <i>TLR3</i>                    | Forward: TGGGACCAAGGCAAAGGAGT<br>Reverse: TTCTCTTGGTTGGGCCACCT        | [1]        |
| <i>TLR7</i>                    | Forward: AATGTCACAGCCGTCCCTAC<br>Reverse: TTATTTTACACGGCGCACA         | [1]        |
| <i>IRF3</i>                    | Forward: GATGCACAGCAGGAGGATTT<br>Reverse: GATTTTATGTGGGTCGTGAGG       | [1]        |
| <i>IRF7</i>                    | Forward: CAGAGTCTTCTTCCAAGAGCTG<br>Reverse: TGCTATCCAGGGAAGACACA      | [1]        |
| <i>IFN-<math>\alpha</math></i> | Forward: GCCTCGCCCTTTGCTTTACT<br>Reverse: CTGTGGGTCTCAGGGAGATCA       | [5]        |
| <i>IFN-<math>\beta</math></i>  | Forward: ATGACCAACAAGTGTCTCCTCC<br>Reverse: GCTCATGGAAAGAGCTGTAGTG    | [5]        |
| $\beta$ -actin                 | Forward: AGAGCTACGAGCTGCCTGAC<br>Reverse: AGCACTGTGTGGCGTACAG         | [6]        |

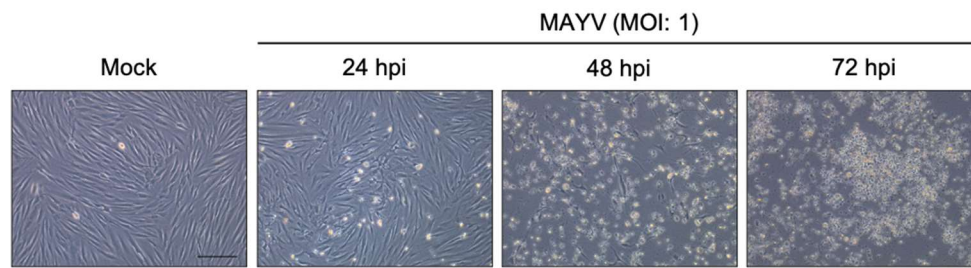

**Figure S1.** Mayaro virus induces a strong, time-dependent cytopathic effect in primary HDFs. HDFs were infected with MAYV at an MOI of 1. At indicated times after infection, images were captured using an inverted microscope and a MCI70-HD camera (Leica). Scale bar: 100  $\mu$ m.

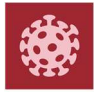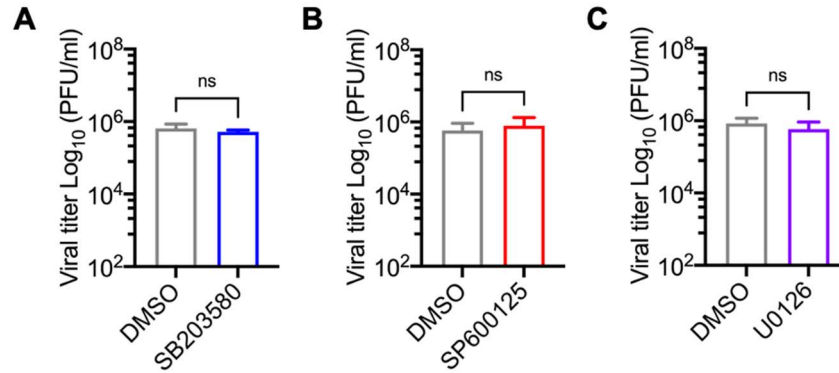

**Figure S2.** MAPK inhibitors SB203580, SP600125 and U0126 show no virucidal activity against MAYV.  $1 \times 10^6$  PFU of MAYV in serum-free MEM were incubated with SB203580 (A), SP600125 (B) or U0126 (C) at 37 °C for 1 h. Then, the remaining virus for each experimental condition was directly quantified using plaque assay. Statistical differences were analyzed using the Mann-Whitney test: ns: non-significant.

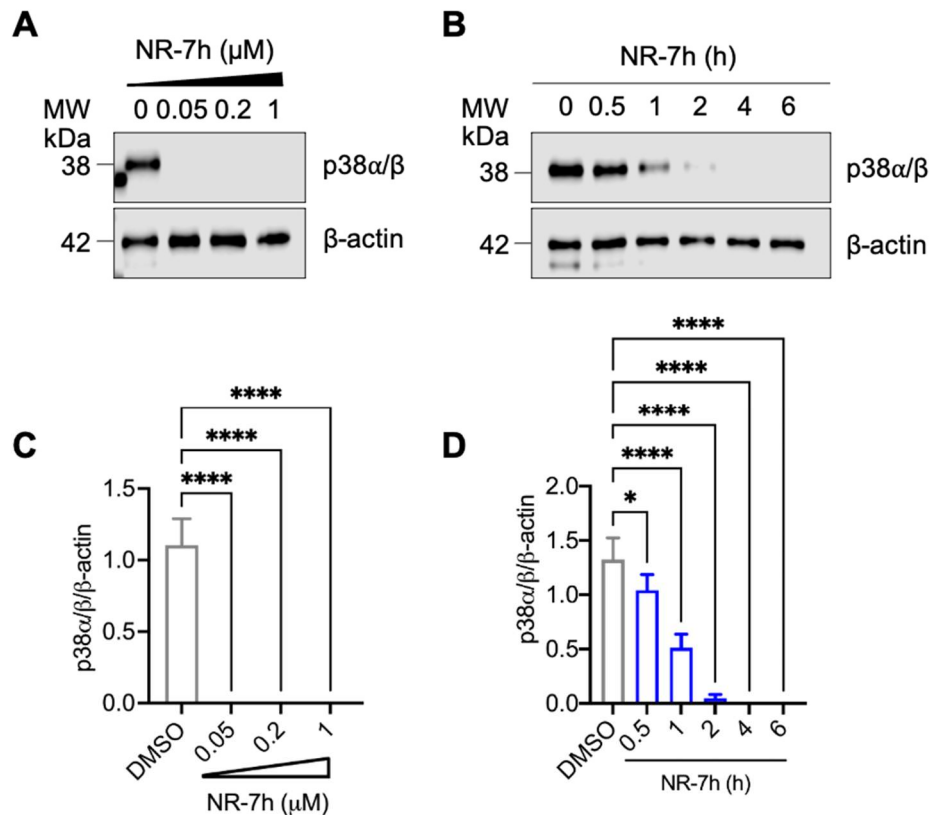

**Figure S3.** Knockdown of p38 $\alpha$  and p38 $\beta$  isoforms using the PROTAC compound NR-7h in HDFs. **(A)** HDFs were treated with increasing concentrations of NR-7h; after 24 h of incubation, p38 $\alpha$ /p38 $\beta$  protein levels were analyzed using immunoblot.  $\beta$ -actin protein was used as a loading control. MW: molecular weight. kDa: kilodaltons. **(B)** HDFs were treated with NR-7h at a concentration of 1  $\mu\text{M}$ ; at different time points, p38 $\alpha$ /p38 $\beta$  protein levels were evaluated as described above. **(C, D)** Densitometric analysis of p38 $\alpha$ /p38 $\beta$  proteins was performed using ImageJ software and normalized with  $\beta$ -actin protein. Statistical differences were analyzed using the One-way ANOVA test followed by Dunnett's post-test: \* $p < 0.05$  and \*\*\*\* $p < 0.0001$ .



## References

1. Hamel, R., et al., *Biology of Zika Virus Infection in Human Skin Cells*. J Virol, 2015. **89**(17): p. 8880-96.
2. Bektas, N., et al., *The ubiquitin-like molecule interferon-stimulated gene 15 (ISG15) is a potential prognostic marker in human breast cancer*. Breast Cancer Res, 2008. **10**(4): p. R58.
3. Stevenson, N.J., et al., *Ribavirin enhances IFN-alpha signalling and MxA expression: a novel immune modulation mechanism during treatment of HCV*. PLoS One, 2011. **6**(11): p. e27866.
4. da Conceicao, T.M., et al., *Essential role of RIG-I in the activation of endothelial cells by dengue virus*. Virology, 2013. **435**(2): p. 281-92.
5. Devhare, P.B., et al., *Analysis of antiviral response in human epithelial cells infected with hepatitis E virus*. PLoS One, 2013. **8**(5): p. e63793.
6. Chen, F., et al., *High-efficiency generation of induced pluripotent mesenchymal stem cells from human dermal fibroblasts using recombinant proteins*. Stem Cell Res Ther, 2016. **7**(1): p. 99.
